# Supplementary material for: Corrosive synthesis and enhanced electromagnetic absorption properties of hollow porous Ni/SnO2 hybrids
Source: Royal Society of Chemistry journal article supplement (doi:10.1039/c5dt02715b), 2015-01-01
Supplement: c5dt02715b1.pdf [file c5dt02715b1.pdf]

## Corrosive synthesis and enhanced electromagnetic absorption properties of hollow porous Ni/SnO<sub>2</sub> hybrids

Biao Zhao <sup>a</sup>, Wanyu Zhao <sup>a</sup>, Gang Shao <sup>a\*</sup>, Bingbing Fan <sup>a</sup>, Rui Zhang <sup>a,b\*</sup>

<sup>a</sup> School of Materials Science and Engineering, Zhengzhou University, Zhengzhou, Henan 450001, PR China

<sup>b</sup> Zhengzhou Aeronautical Institute of Industry Management, Zhengzhou, Henan 450046, PR China

\* Corresponding Author.

Dr. Gang Shao

E-mail address: gang\_shao@zzu.edu.cn

Prof. Rui Zhang

Tel: +86-371-60632007

Fax: +86-371-60632600

E-mail address: [zhangray@zzu.edu.cn](mailto:zhangray@zzu.edu.cn)

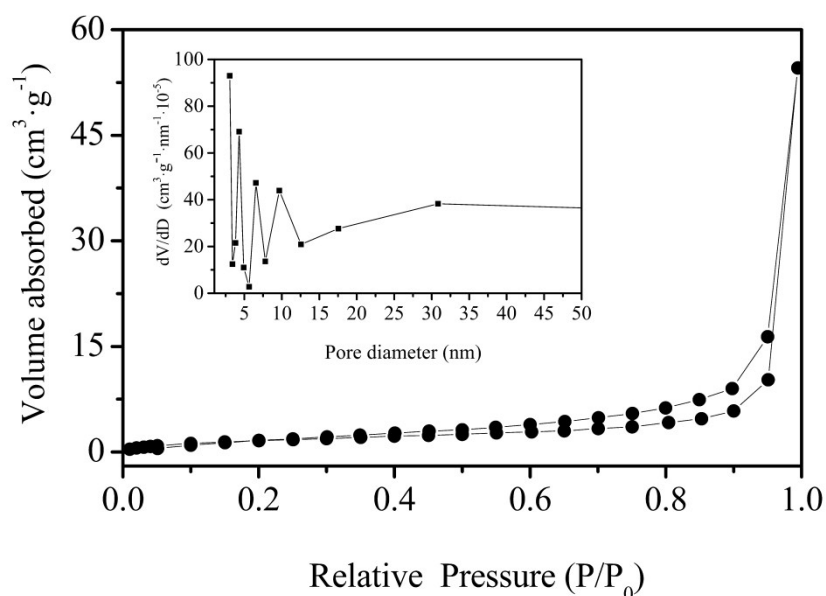

**Figure S1** (a) The nitrogen adsorption–desorption isotherms of hollow porous Ni/SnO<sub>2</sub> structures. The inset is the pore size distribution.

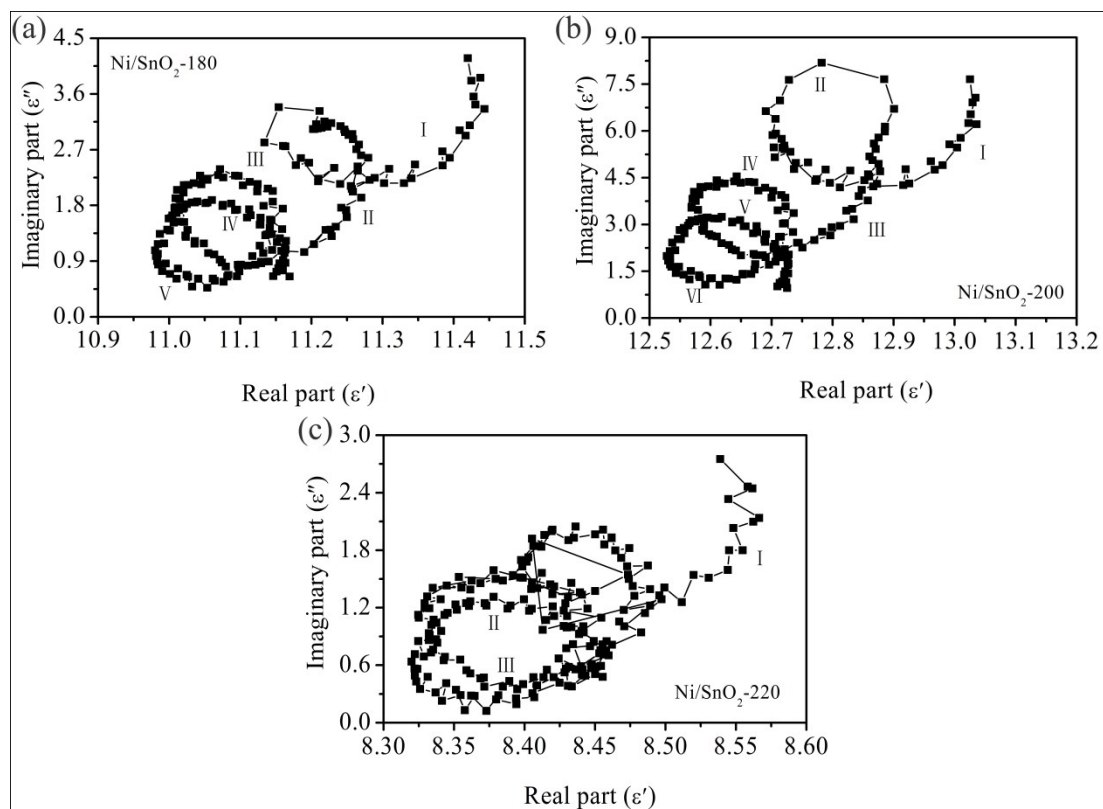

**Figure S2** (a-c) Typical Cole-Cole semicircles ( $\epsilon''$  versus  $\epsilon'$ ) for Ni/SnO<sub>2</sub> hybrids in the frequency range of 1-18 GHz

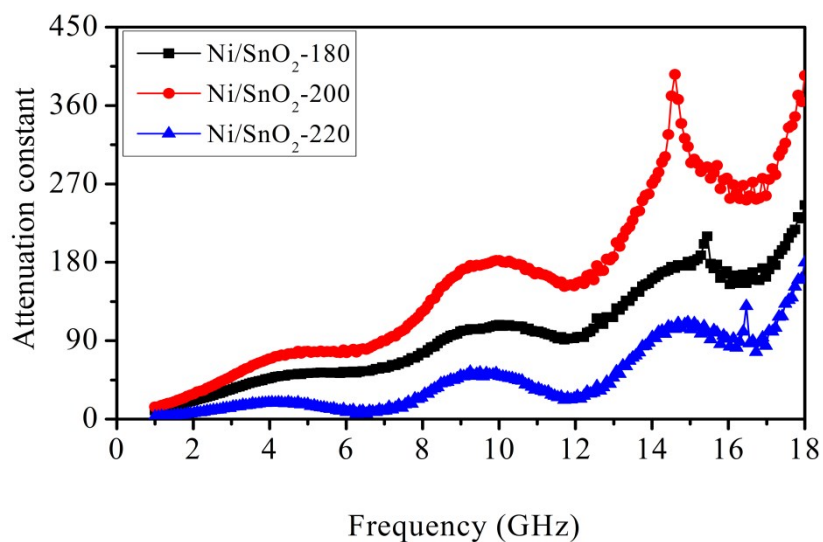

**Figure S3** Attenuation constant of Ni/SnO<sub>2</sub> hybrid-paraffin composites versus frequency.

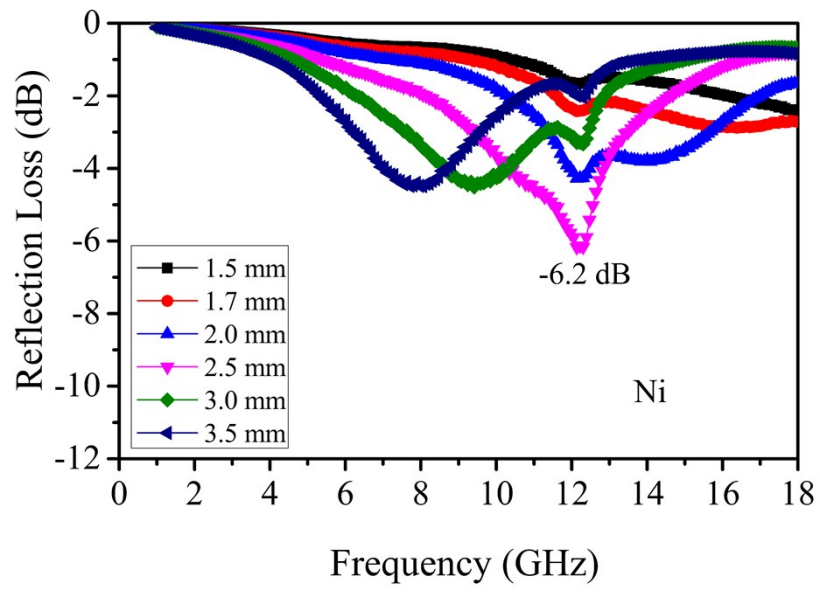

**Figure S4** Calculated results of the reflection loss vs frequency for Ni microspheres with different thicknesses
